# Supplementary material
Source: ML conference proceedings conference paper supplement (https://openreview.net/forum?id=XAe1uIBVsk)

ROC Curves for Different Class Imbalance Handling Strategies

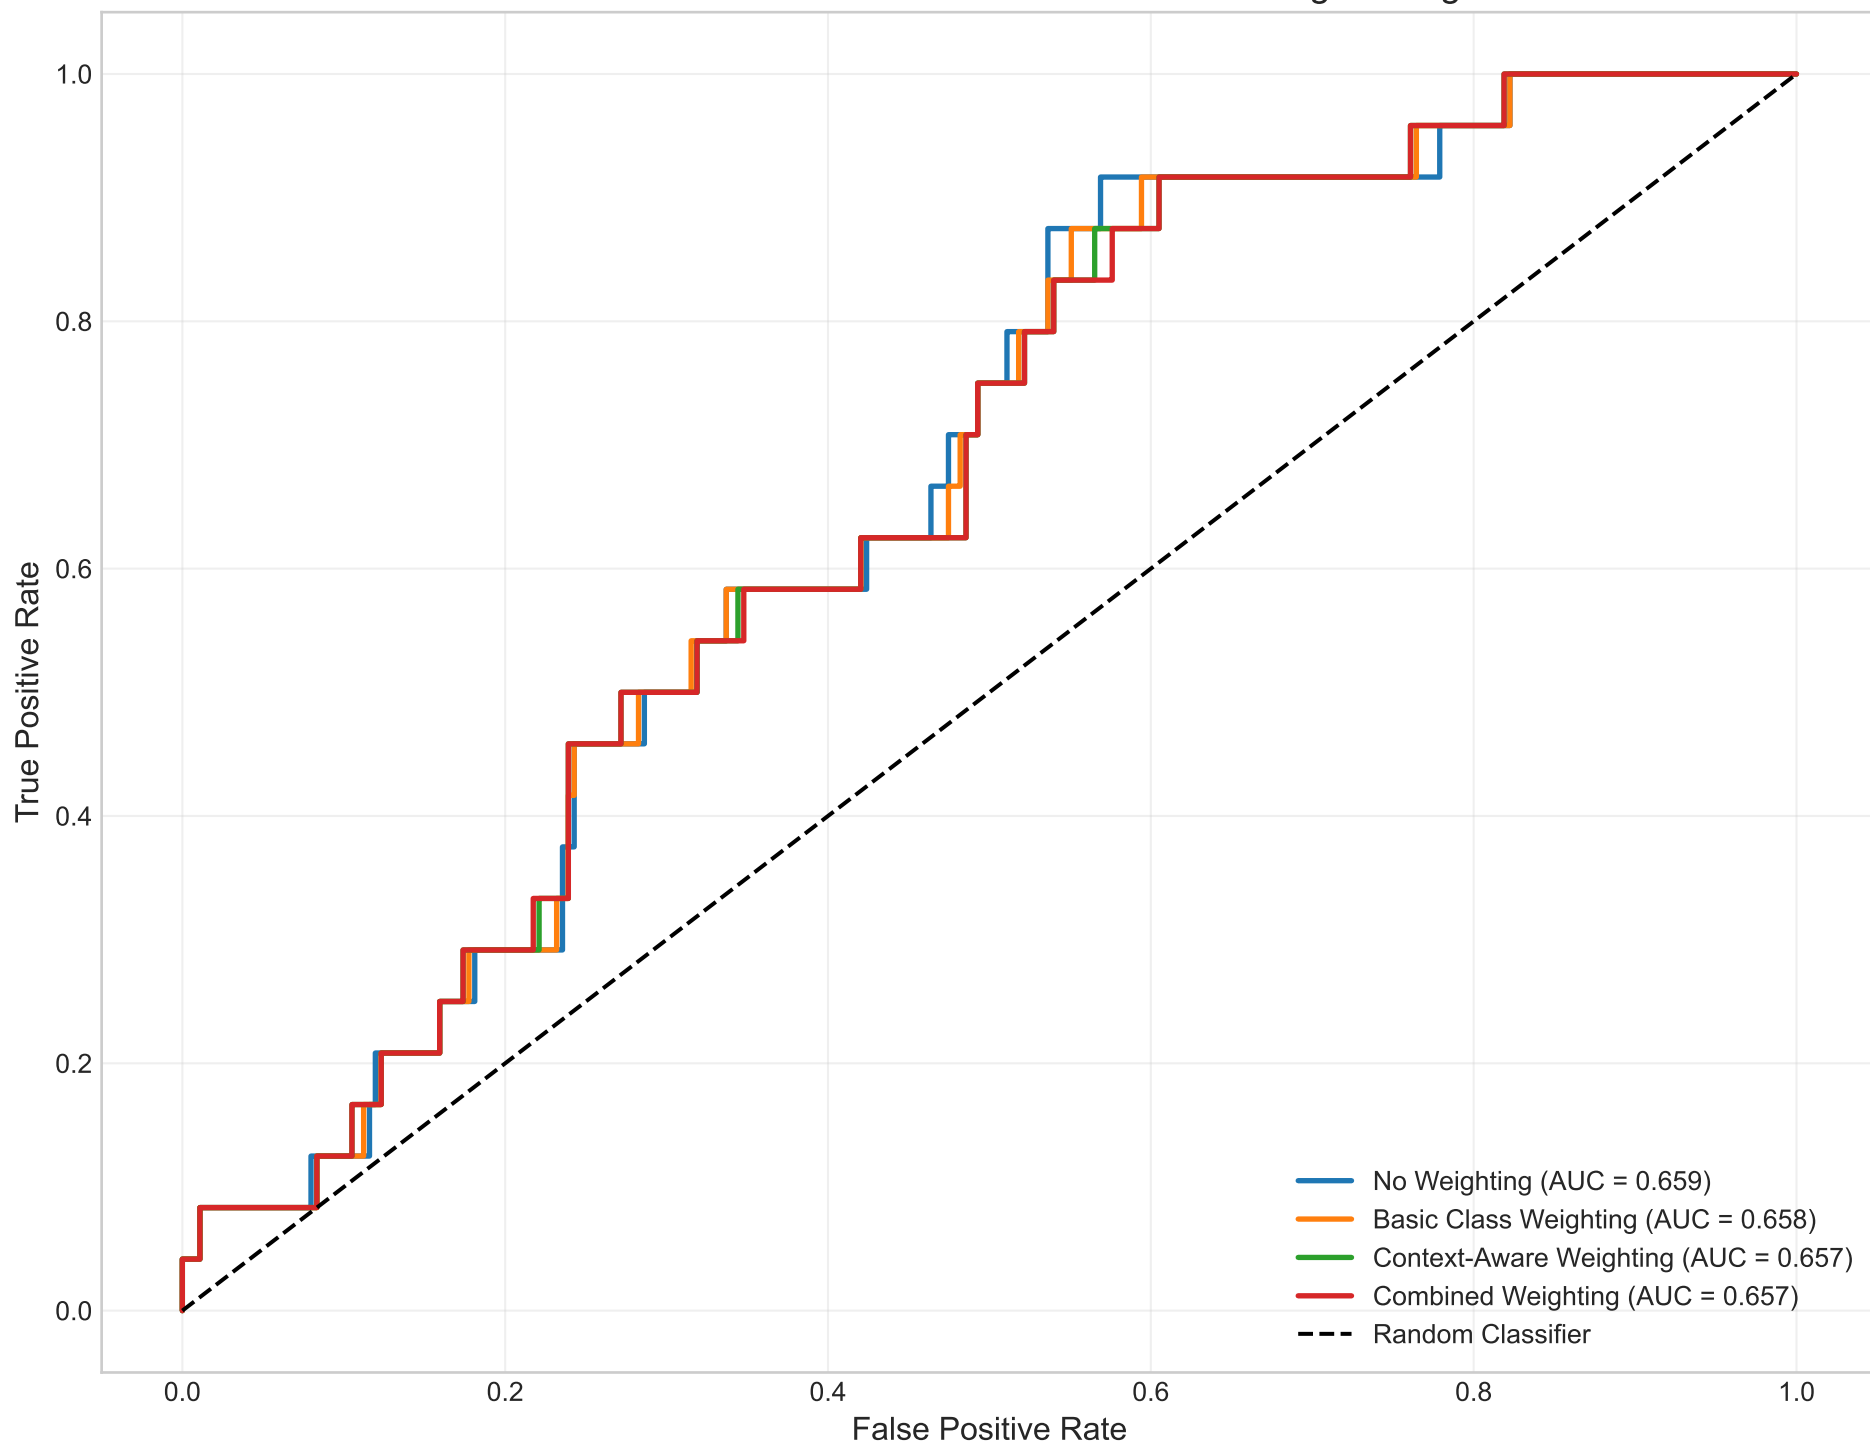

Supplement: supplementary_material [file class_imbalance_roc.pdf › Supplementary_A4S_From On-Field Actions to Internal States-A Latent Variable Framework for Analyzing Athlete Performance/sourcecode/figures/class_imbalance_roc.pdf]

# EM Algorithm Convergence for Different Models

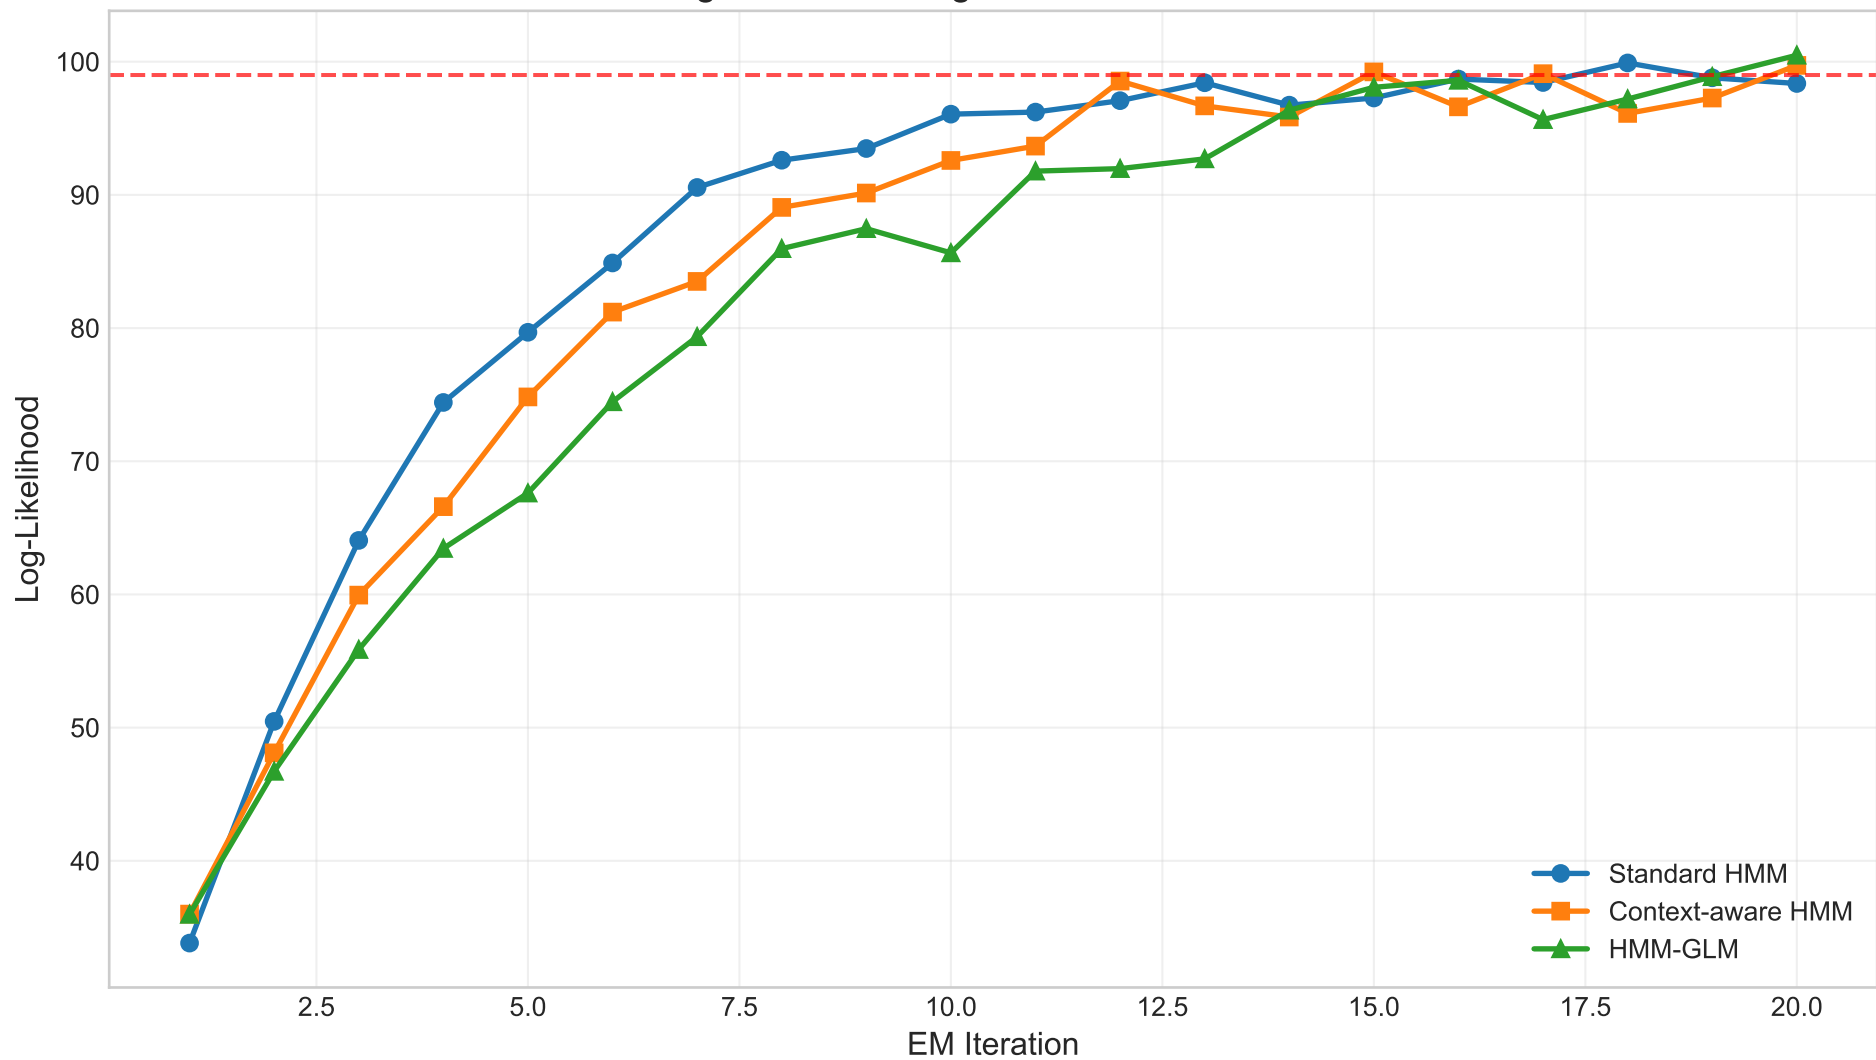

Supplement: supplementary_material [file em_convergence.pdf › Supplementary_A4S_From On-Field Actions to Internal States-A Latent Variable Framework for Analyzing Athlete Performance/sourcecode/figures/em_convergence.pdf]

Goalie Base Random Effects

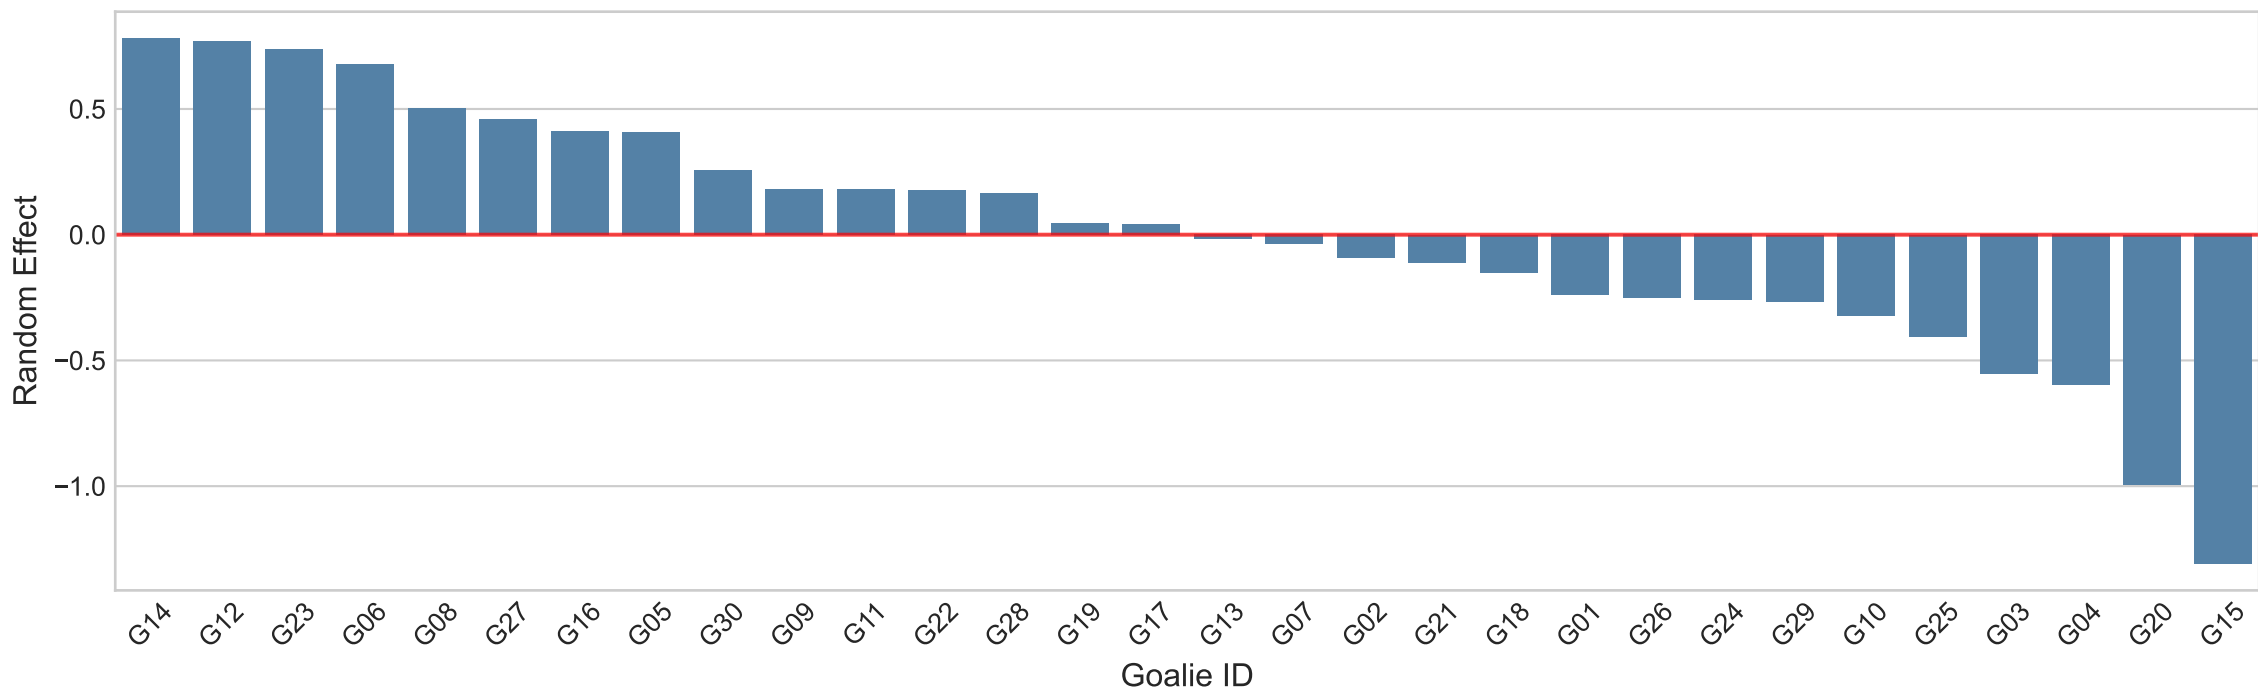

Goalie Random Effects by Shot Type

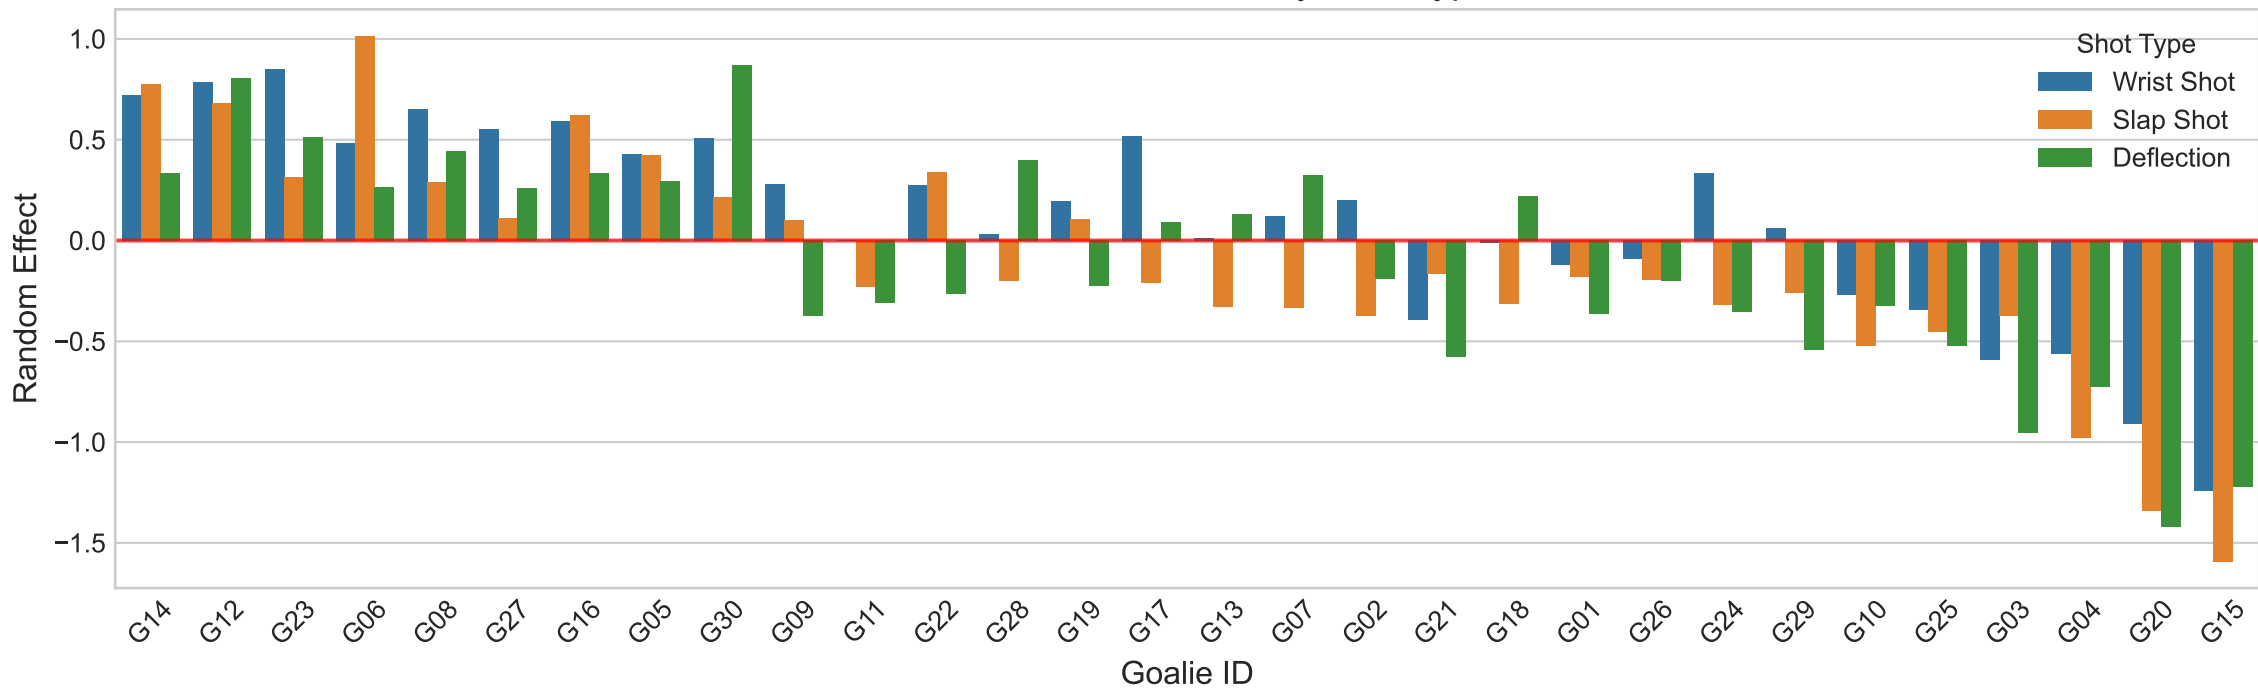

Supplement: supplementary_material [file goalie_random_effects.pdf › Supplementary_A4S_From On-Field Actions to Internal States-A Latent Variable Framework for Analyzing Athlete Performance/sourcecode/figures/goalie_random_effects.pdf]

State Diversity with Different Multimodal Data Combinations

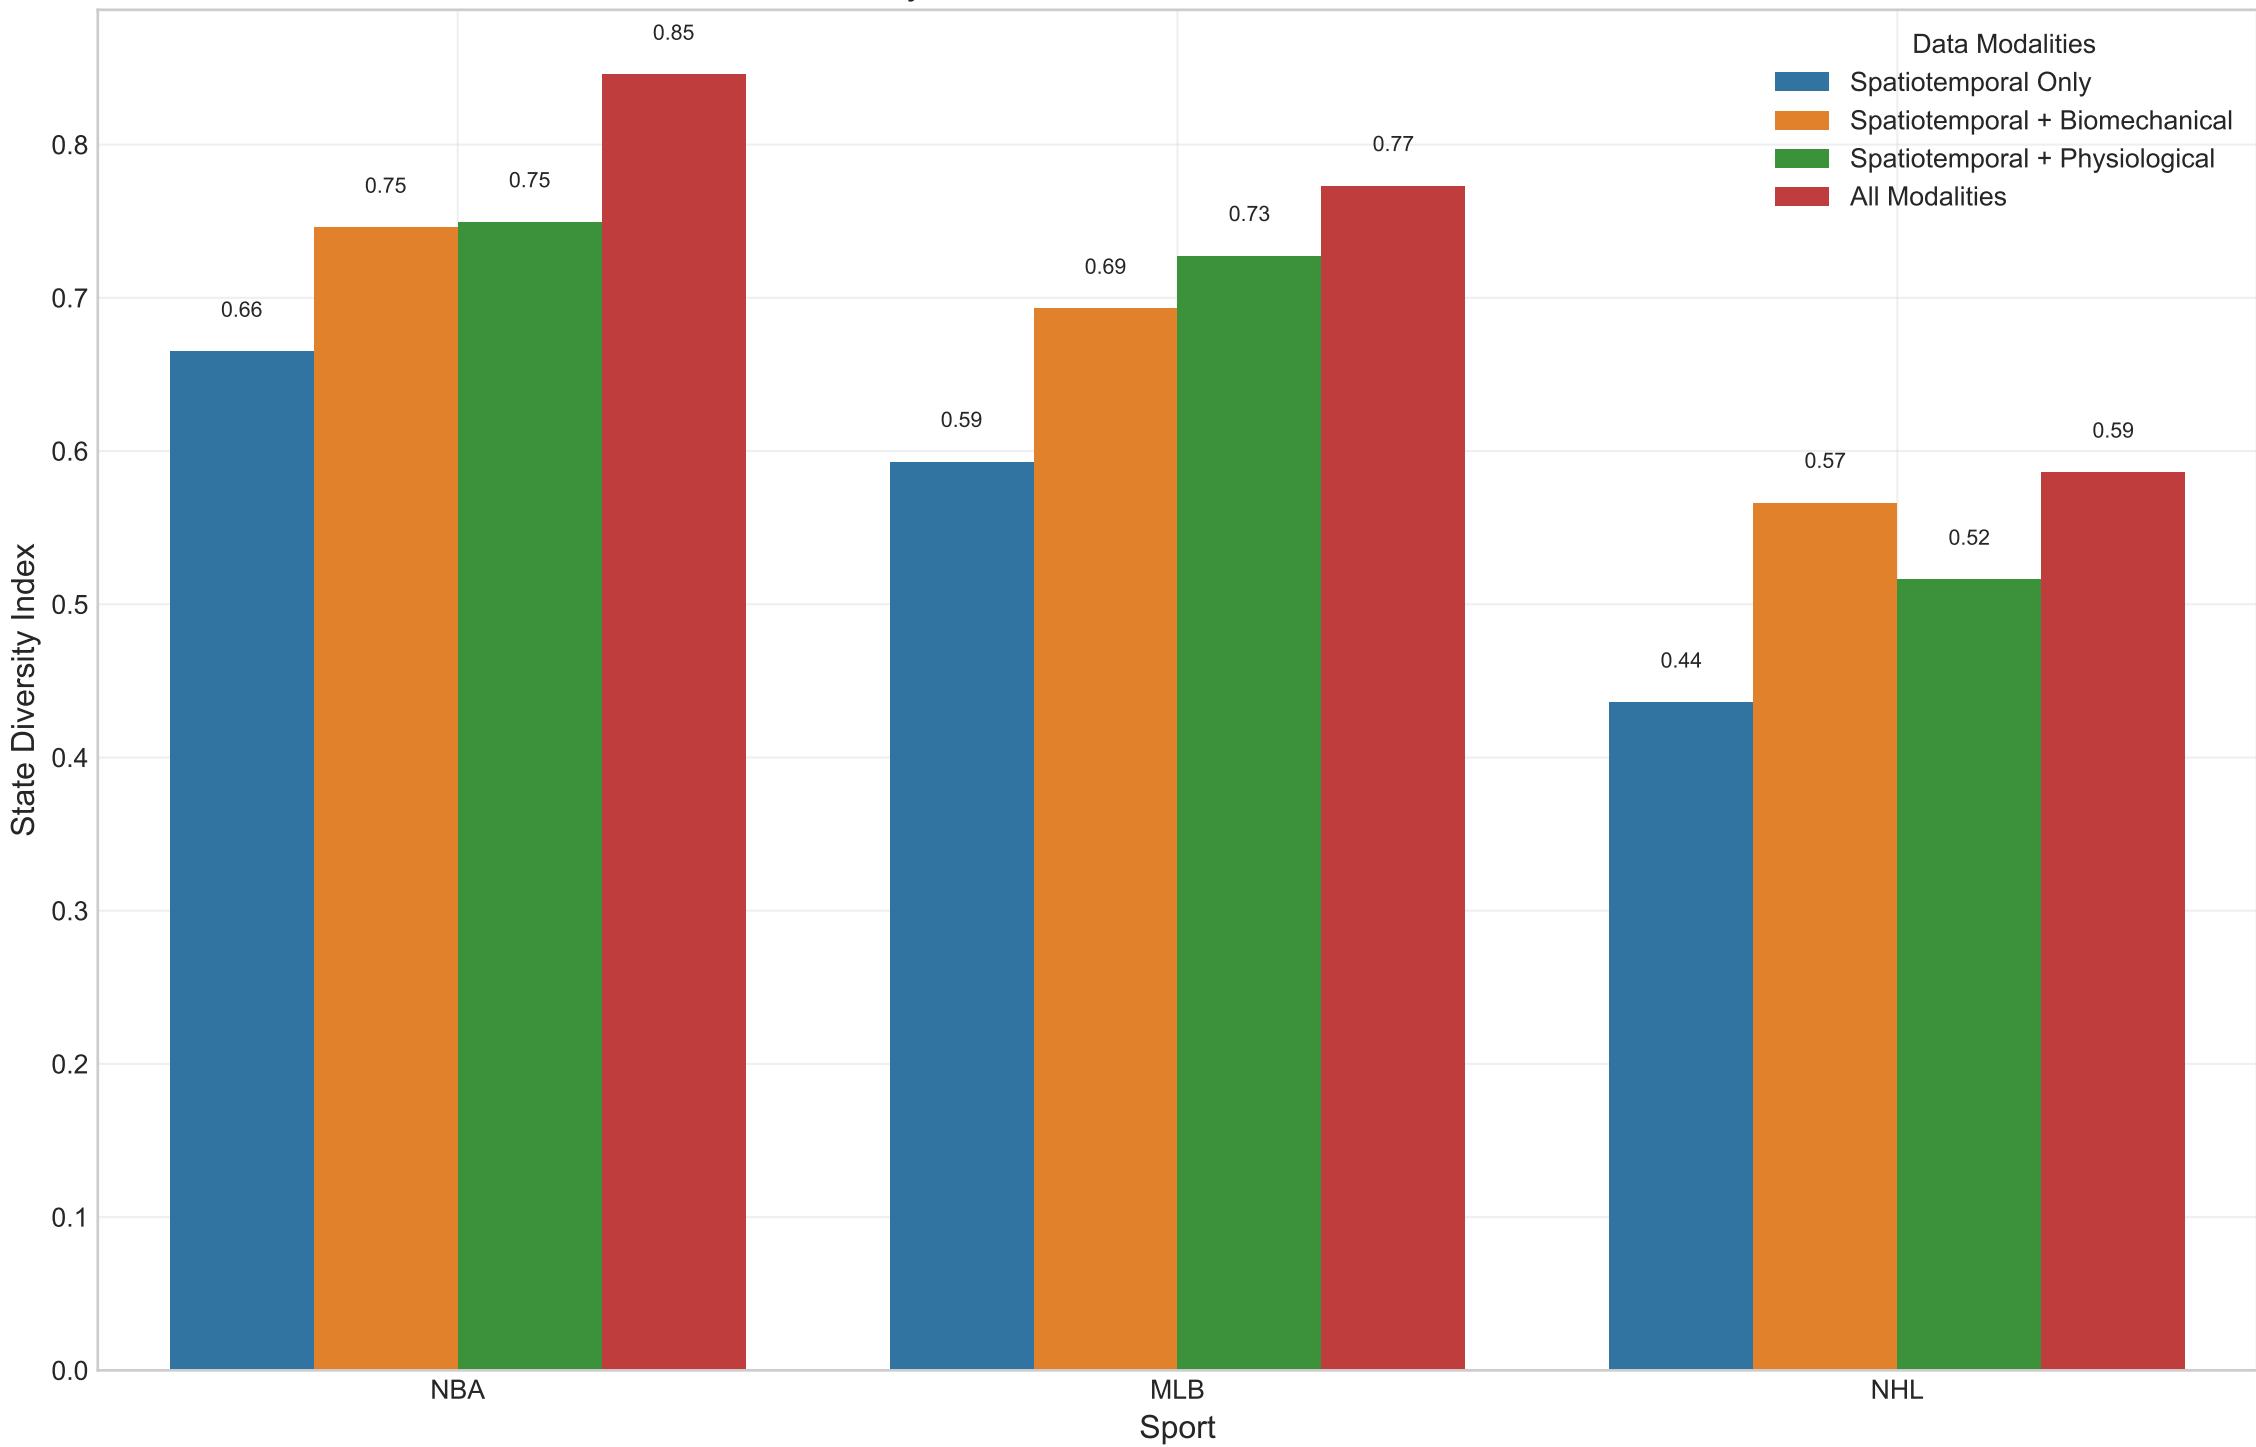

Supplement: supplementary_material [file multimodal_state_diversity.pdf › Supplementary_A4S_From On-Field Actions to Internal States-A Latent Variable Framework for Analyzing Athlete Performance/sourcecode/figures/multimodal_state_diversity.pdf]

ROC Curves for Different Class Imbalance Handling Strategies



Supplement: supplementary_material [file class_imbalance_roc.pdf › Supplementary_A4S_From On-Field Actions to Internal States-A Latent Variable Framework for Analyzing Athlete Performance/sourcecode/hmm-glm-sports/figures/class_imbalance_roc.pdf]

# EM Algorithm Convergence for Different Models

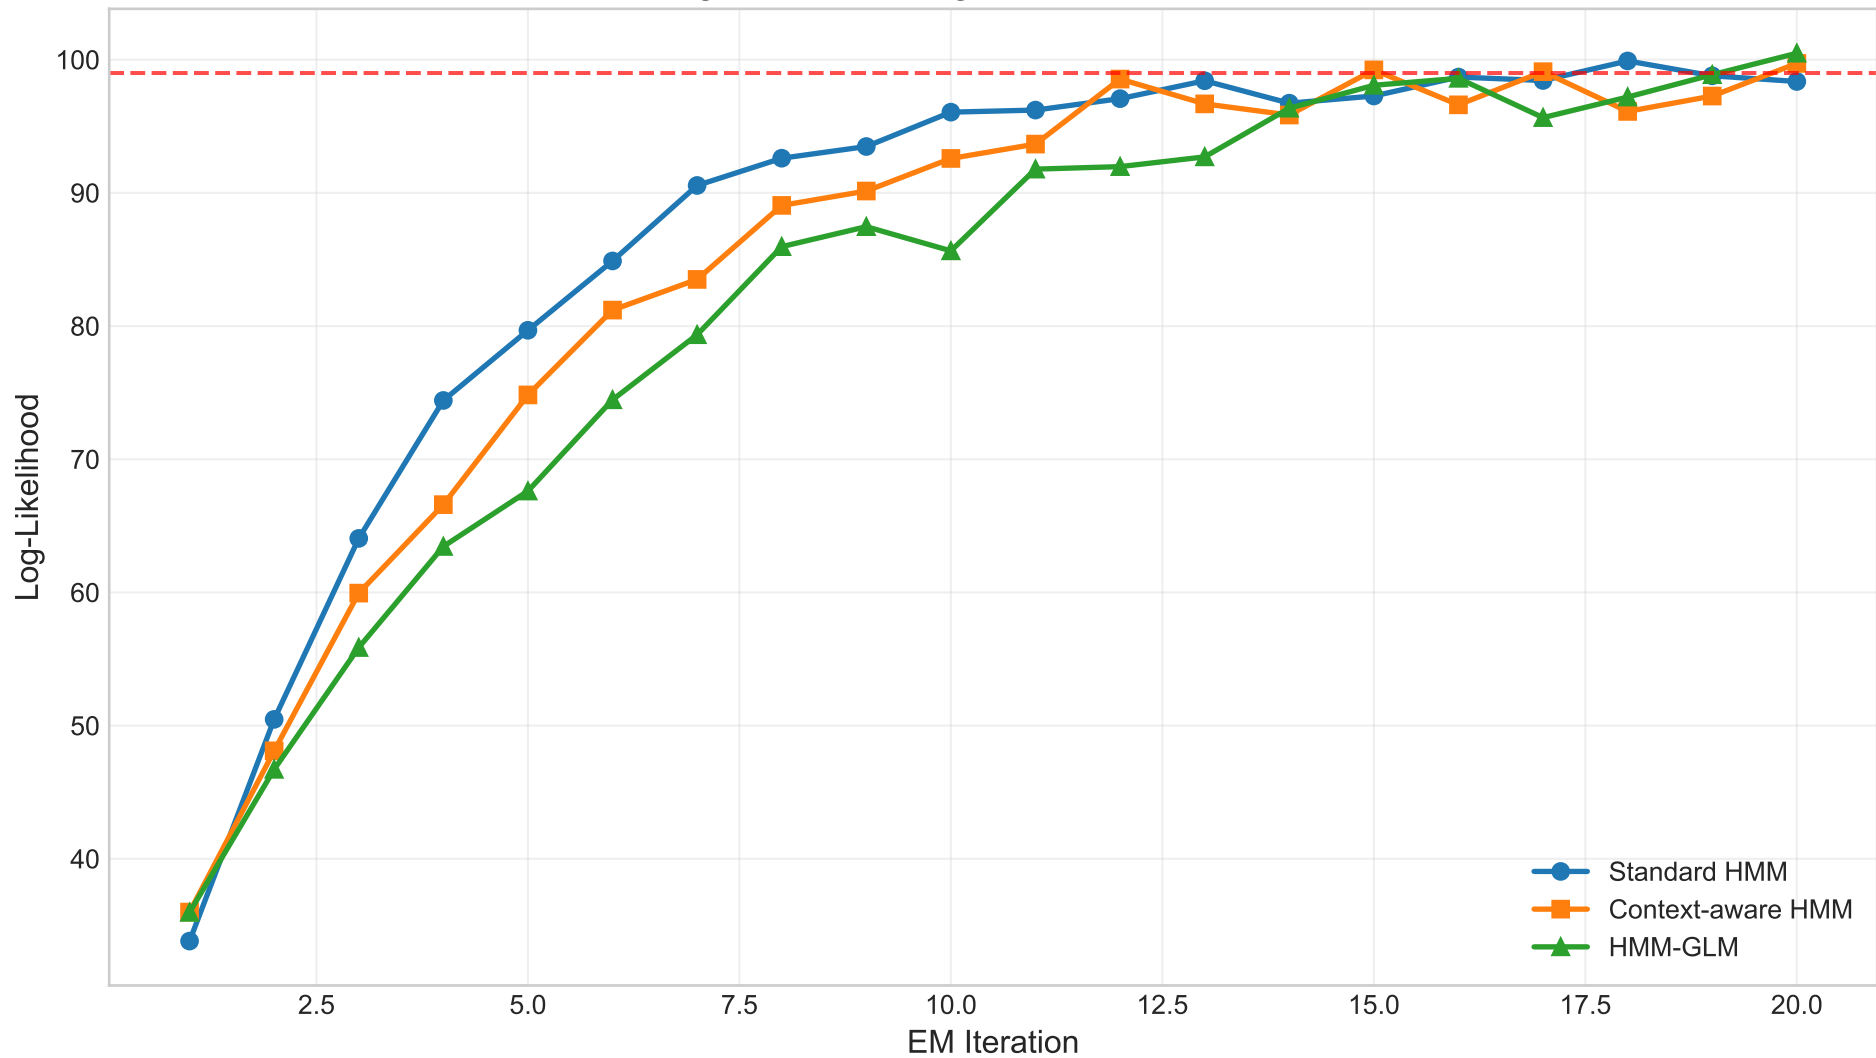

Supplement: supplementary_material [file em_convergence.pdf › Supplementary_A4S_From On-Field Actions to Internal States-A Latent Variable Framework for Analyzing Athlete Performance/sourcecode/hmm-glm-sports/figures/em_convergence.pdf]

Goalie Base Random Effects

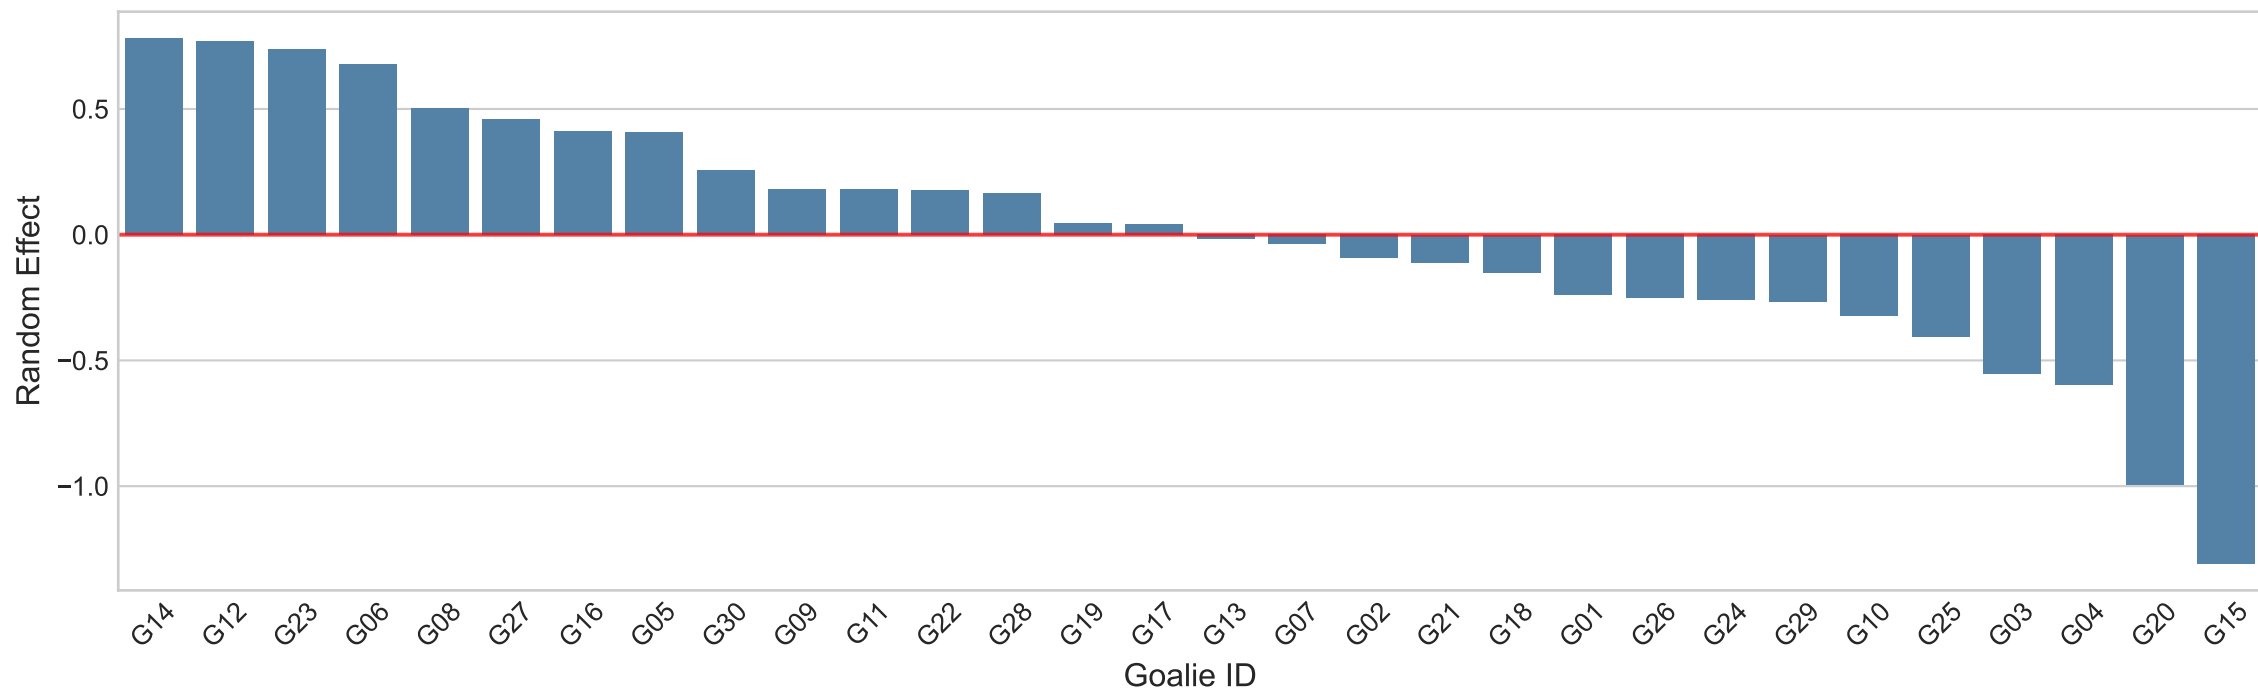

Goalie Random Effects by Shot Type

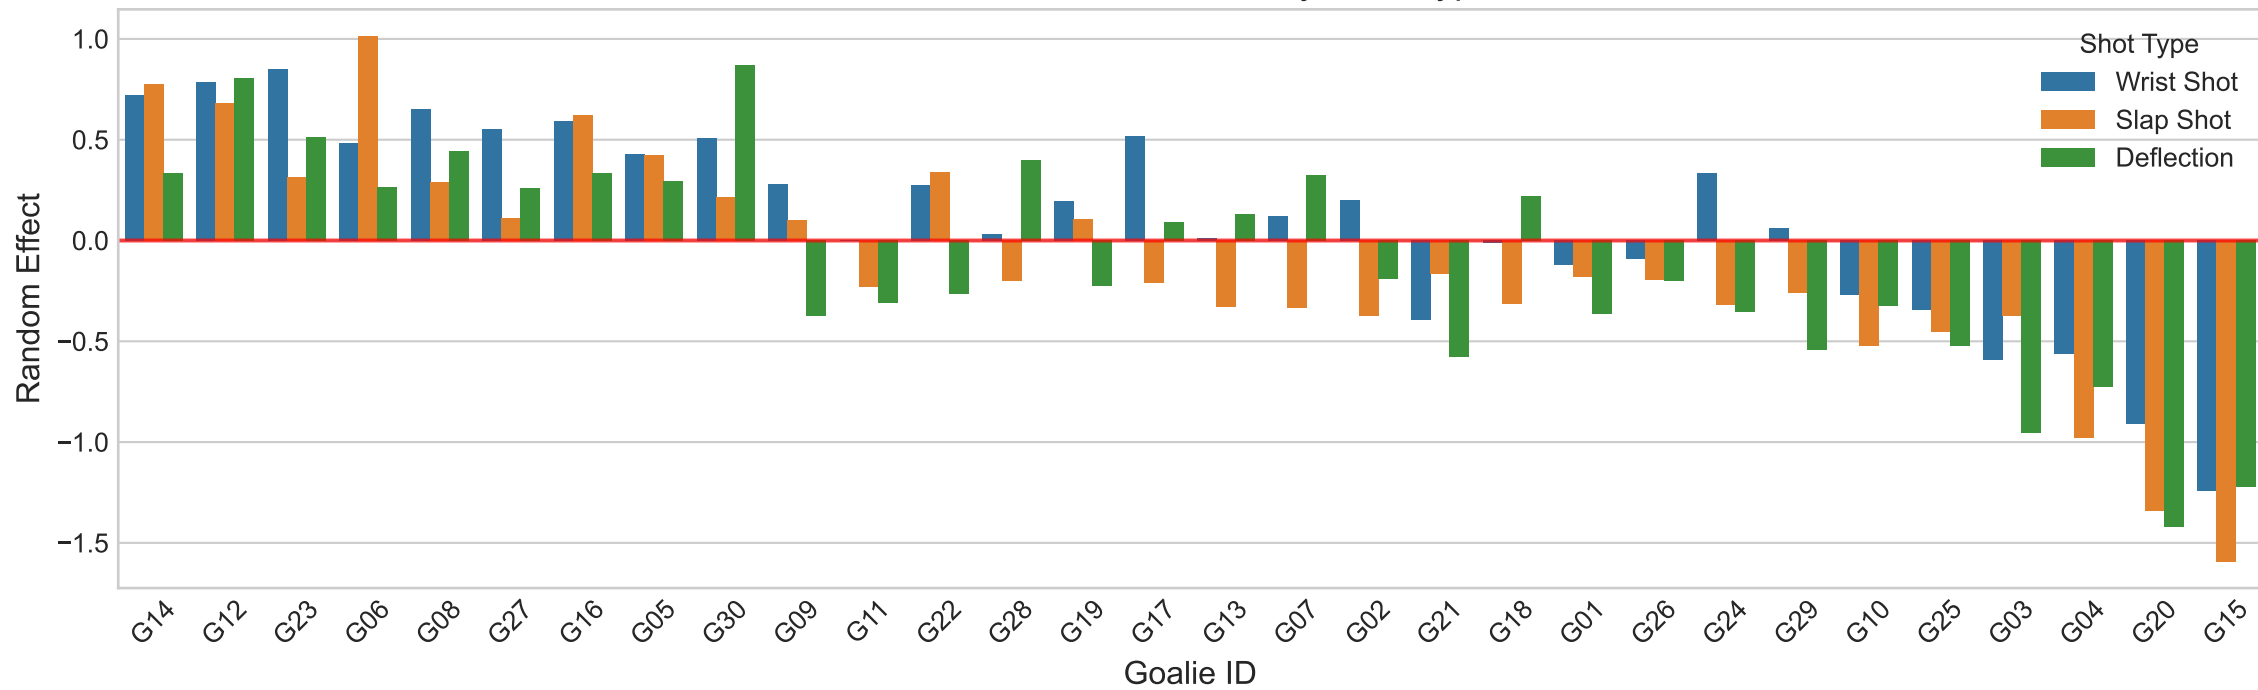

Supplement: supplementary_material [file goalie_random_effects.pdf › Supplementary_A4S_From On-Field Actions to Internal States-A Latent Variable Framework for Analyzing Athlete Performance/sourcecode/hmm-glm-sports/figures/goalie_random_effects.pdf]

State Diversity with Different Multimodal Data Combinations

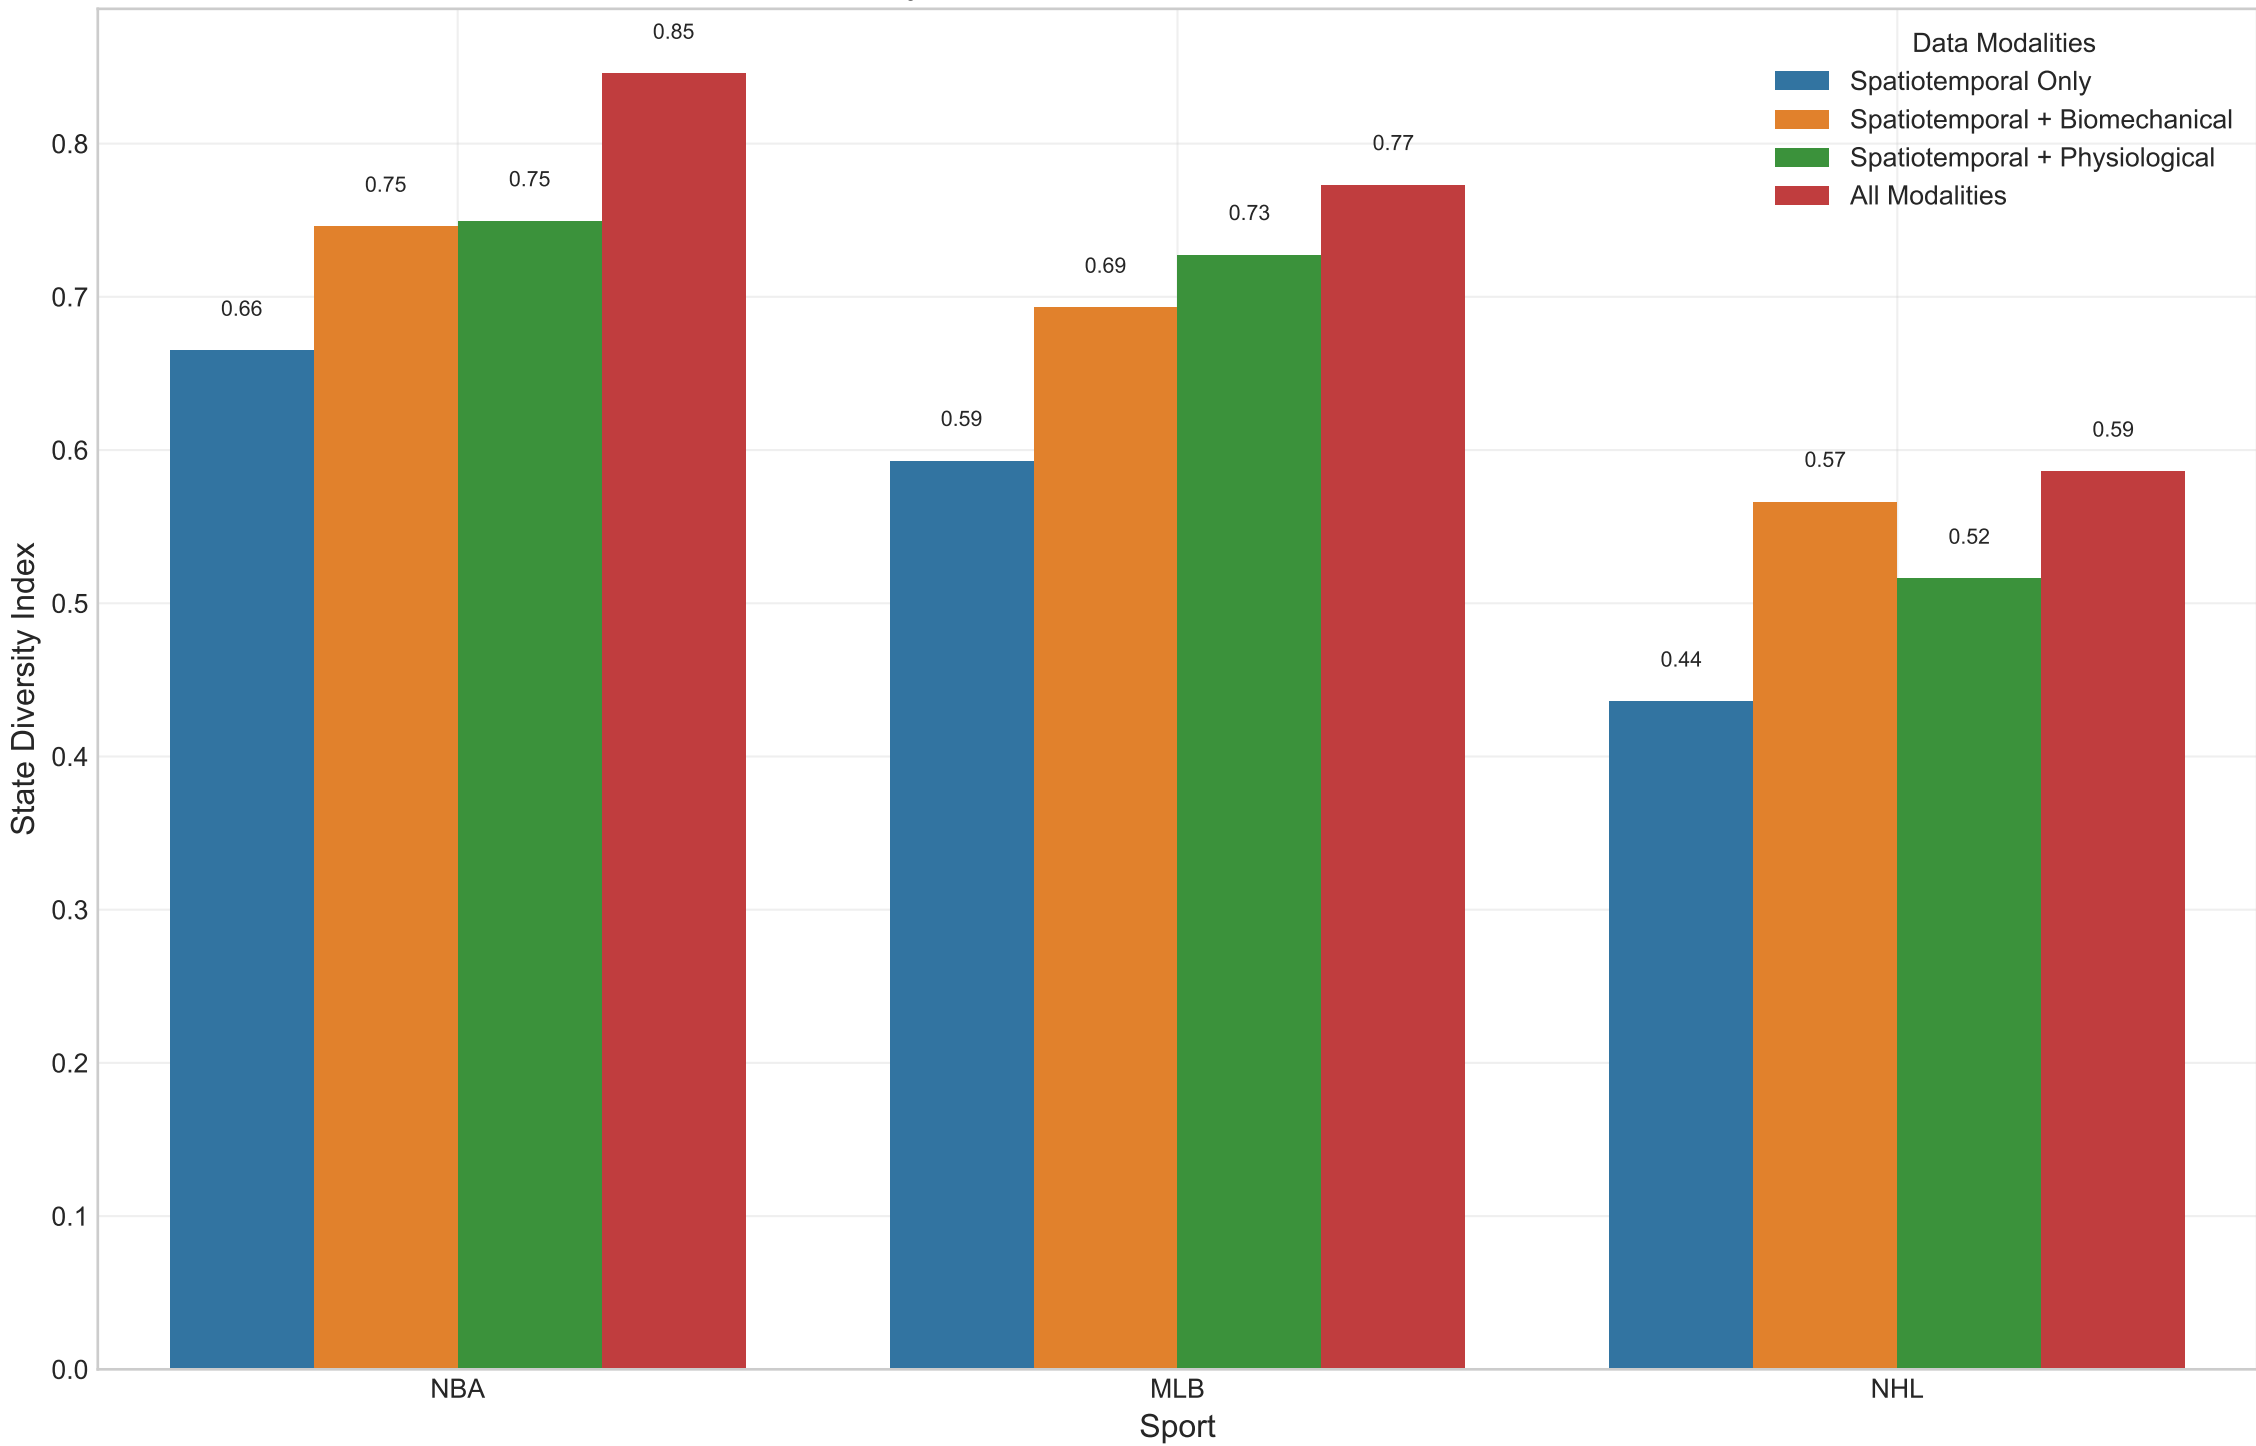

Supplement: supplementary_material [file multimodal_state_diversity.pdf › Supplementary_A4S_From On-Field Actions to Internal States-A Latent Variable Framework for Analyzing Athlete Performance/sourcecode/hmm-glm-sports/figures/multimodal_state_diversity.pdf]
